# Supplementary material for: Comparative genomics of the Gram-positive bacterial pathogen of maize, Clavibacter nebraskensis, reveals genomic variation between strains of varying aggressiveness
Source: Research Square preprint supplement (doi:10.21203/rs.3.rs-7860969/v1), 2025-10-21
Supplement: Supplementary file 1 [file 7d91a47a4a0152d5baa3554f.docx]

**Supplementary Information**

**Supplementary Table 1.** BUSCOpercentagevalues using microbacteriaceae_odb12 as lineage dataset.

| **Strain** | **Complete** | **Single-copy** | **Duplicated** | **Fragmented** | **Missing** |
| --- | --- | --- | --- | --- | --- |
| CDK032 | 99.2 | 98.9 | 0.3 | 0.5 | 0.3 |
| CDK039 | 99.4 | 99 | 0.3 | 0.3 | 0.3 |
| CDK044 | 99 | 98.7 | 0.3 | 0.6 | 0.3 |
| CDK045 | 99 | 98.7 | 0.3 | 0.6 | 0.3 |
| CDK046 | 99.4 | 99 | 0.3 | 0.3 | 0.3 |
| CDK057 | 99.2 | 98.9 | 0.3 | 0.5 | 0.3 |
| CDK091 | 99.4 | 99 | 0.3 | 0.3 | 0.3 |
| CDK110 | 99.4 | 99 | 0.3 | 0.3 | 0.3 |
| CIC056 | 99.4 | 99 | 0.3 | 0.3 | 0.3 |
| CIC251 | 99.4 | 99 | 0.3 | 0.3 | 0.3 |
| CIC252 | 99.4 | 99 | 0.3 | 0.3 | 0.3 |
| CIC296 | 99.2 | 98.9 | 0.3 | 0.5 | 0.3 |
| CIC349 | 99.4 | 98.9 | 0.5 | 0.3 | 0.3 |
| CIC359 | 99.4 | 99 | 0.3 | 0.3 | 0.3 |
| CIC365 | 99.4 | 99 | 0.3 | 0.3 | 0.3 |
| CIC369 | 99.4 | 99 | 0.3 | 0.3 | 0.3 |
| CIC400 | 99.4 | 99 | 0.3 | 0.3 | 0.3 |

**Supplementary Table 2.** (CSV file) Matrix of orthologous gene family (orthogroup) counts contained in *Cn* strains analyzed in this study.

**Supplementary Table 3.** (CSV file)Non-plasmid genomic islands predicted by IslandViewer4.

**Supplementary Table 4.** Results of plasmid CDS checked against the non-redundant protein database on NCBI using the BLASTp algorithm.

| **Locus Tag** | **BLASTp Hit Description** | **%Identity** | **Accession** |
| --- | --- | --- | --- |
| CDK032_03008 | hypothetical protein [Clavibacter michiganensis] | 97.34 | WP_337444577.1 |
| CDK032_03007 | SCO6880 family protein [Clavibacter nebraskensis] | 98.23 | WP_248888105.1 |
| CDK032_03006 | ATP-binding protein [Clavibacter michiganensis] | 98.02 | WP_337444575.1 |
| CDK032_03005 | AAA family ATPase [Clavibacter michiganensis] | 97.48 | WP_337444574.1 |
| CDK032_03004 | hypothetical protein [Clavibacter nebraskensis] | 91.5 | WP_248888102.1 |
| CDK032_03003 | C40 family peptidase [Clavibacter michiganensis] | 98 | WP_337444572.1 |
| CDK032_03002 | hypothetical protein [Clavibacter nebraskensis] | 90.83 | WP_248888100.1 |
| CDK032_03001 | hypothetical protein [Clavibacter michiganensis] | 98.57 | WP_094182742.1 |
| CDK032_03000 | type IV secretory system conjugative DNA transfer family protein [Clavibacter michiganensis] | 97.98 | WP_094182741.1 |
| CDK032_02999 | DUF4913 domain-containing protein [Clavibacter michiganensis] | 95.68 | WP_337444568.1 |
| CDK032_02998 | relaxase domain-containing protein [Clavibacter nebraskensis] | 94.96 | UQB17893.1 |
| CDK032_02997 | relaxase domain-containing protein [Clavibacter michiganensis] | 81.2 | WP_104293290.1 |
| CDK032_02996 | hypothetical protein [Clavibacter michiganensis] | 90.97 | WP_316292045.1 |
| CDK032_02995 | hypothetical protein [Clavibacter michiganensis] | 98.15 | WP_011931161.1 |
| CDK032_02994 | hypothetical protein [Clavibacter michiganensis] | 87.77 | WP_303062862.1 |
| CDK032_02993 | HNH endonuclease family protein [Clavibacter michiganensis] | 92.22 | WP_045530870.1 |
| CDK032_02992 | hypothetical protein [Clavibacter michiganensis] | 89.6 | WP_337444562.1 |
| CDK032_02991 | single-stranded DNA-binding protein [Clavibacter michiganensis] | 93.57 | WP_316289084.1 |
| CDK032_02990 | hypothetical protein [Clavibacter] | 94.87 | WP_158385430.1 |
| CDK032_02989 | ArdC-like ssDNA-binding domain-containing protein [Clavibacter michiganensis] | 92 | WP_094171453.1 |
| CDK032_02988 | hypothetical protein LIX22_002955 [Clavibacter nebraskensis] | 97.12 | UQB17884.1 |
| CDK032_02987 | hypothetical protein [Clavibacter] | 71.67 | WP_012296889.1 |
| CDK032_02986 | ParB/RepB/Spo0J family partition protein [Clavibacter michiganensis] | 97.1 | WP_337444592.1 |
| CDK032_02985 | hypothetical protein [Clavibacter capsici] | 97.98 | WP_053775969.1 |
| CDK032_02984 | hypothetical protein [Clavibacter michiganensis] | 91.47 | WP_316291759.1 |
| CDK032_02983 | Fic family protein [Clavibacter michiganensis] | 87.27 | WP_087196148.1 |
| CDK032_02982 | Fic family protein [Clavibacter] | 88.95 | WP_012296886.1 |
| CDK032_02981 | hypothetical protein [Clavibacter sp. VKM Ac-2872] | 98.55 | WP_194668056.1 |
| CDK032_02980 | hypothetical protein WDV94_17980 [Clavibacter michiganensis subsp. tessellarius] | 94.81 | WXZ51462.1 |
| CDK032_02979 | hypothetical protein [Ruicaihuangia caeni] | 46.89 | WP_281487198.1 |
| CDK032_02978 | N/A |  |  |
| CDK032_02977 | DUF2510 domain-containing protein [Clavibacter phaseoli] | 81.82 | WP_147359342.1 |
| CDK032_02976 | hypothetical protein [Cryobacterium lyxosi] | 85.08 | WP_134571380.1 |
| CDK032_02975 | hypothetical protein [Curtobacterium flaccumfaciens] | 76.24 | WP_194624216.1 |
| CDK032_02974 | hypothetical protein [Clavibacter michiganensis] | 91.67 | WP_167604102.1 |
| CDK032_02973 | phosphoribosyltransferase family protein [Clavibacter sp. B3I6] | 87.64 | WP_307503684.1 |
| CDK032_02972 | hypothetical protein [Gulosibacter chungangensis] | 60.75 | WP_158053418.1 |
| CDK032_02971 | HEPN domain-containing protein [Curtobacterium flaccumfaciens] | 63.13 | WP_214541916.1 |
| CDK032_02970 | DUF4238 domain-containing protein [Frigoribacterium sp. Leaf8] | 73.81 | WP_082460168.1 |
| CDK032_02969 | hypothetical protein [Rathayibacter sp. AY1C5] | 76.01 | WP_146082469.1 |
| CDK032_02968 | hypothetical protein [Clavibacter michiganensis] | 73.1 | WP_316289059.1 |
| CDK032_02967 | hypothetical protein [Clavibacter californiensis] | 94.76 | WP_119372110.1 |
| CDK032_02966 | SOS response-associated peptidase [Clavibacter michiganensis] | 95.5 | WP_231840590.1 |
| CDK032_02965 | Lsr2 family protein [Clavibacter michiganensis] | 100 | WP_011931186.1 |
| CDK032_02964 | MFS transporter [Clavibacter michiganensis] | 86.65 | WP_316288562.1 |
| CDK032_02963 | RHS repeat-associated core domain-containing protein [Clavibacter michiganensis] | 96.12 | WP_227325351.1 |
| CDK032_02962 | hypothetical protein [Clavibacter michiganensis] | 97.35 | WP_094182713.1 |
| CDK032_02961 | hypothetical protein [Clavibacter michiganensis] | 91.84 | WP_157444686.1 |
| CDK032_02960 | hypothetical protein [Clavibacter michiganensis] | 92.98 | WP_273946721.1 |
| CDK032_02959 | DUF3560 domain-containing protein [Clavibacter michiganensis] | 89.02 | WP_367153335.1 |
| CDK032_02958 | hypothetical protein LIX22_003002 [Clavibacter nebraskensis] | 93.42 | UQB17863.1 |
| CDK032_02957 | hypothetical protein [Clavibacter michiganensis] | 95.83 | WP_337444585.1 |
| CDK032_02956 | XRE family transcriptional regulator [Clavibacter michiganensis] | 97.95 | WP_337444584.1 |
| CDK032_02955 | hypothetical protein [Clavibacter michiganensis] | 98.03 | WP_337444582.1 |
| CDK032_02954 | alpha/beta fold hydrolase [Clavibacter michiganensis] | 96.3 | WP_337444581.1 |
| CDK032_02953 | hypothetical protein [Clavibacter michiganensis] | 90.61 | WP_337446823.1 |
| CDK032_02952 | hypothetical protein [Clavibacter michiganensis] | 71.19 | WP_337444579.1 |
| CDK039_03034 | hypothetical protein [Clavibacter phaseoli] | 82.09 | WP_194676301.1 |
| CDK039_03033 | hypothetical protein [Clavibacter phaseoli] | 57.5 | WP_194676292.1 |
| CDK039_03032 | hypothetical protein [Clavibacter] | 72.25 | WP_041465163.1 |
| CDK039_03031 | N/A |  |  |
| CDK039_03030 | antitoxin VbhA family protein [Clavibacter] | 89.29 | WP_012300321.1 |
| CDK039_03029 | N/A |  |  |
| CDK039_03028 | hypothetical protein [Clavibacter sp. VKM Ac-2542] | 81.82 | WP_194683958.1 |
| CDK039_03027 | hypothetical protein [Clavibacter] | 69.31 | WP_043588233.1 |
| CDK039_03026 | hypothetical protein [Clavibacter sp. VKM Ac-2542] | 75 | WP_194683962.1 |
| CDK039_03025 | hypothetical protein [Clavibacter sp. VKM Ac-2872] | 71.21 | WP_194667706.1 |
| CDK039_03024 | hypothetical protein [Clavibacter] | 77.78 | WP_012300419.1 |
| CDK039_03023 | hypothetical protein [Clavibacter] | 75 | WP_012300418.1 |
| CDK039_03022 | hypothetical protein [Clavibacter] | 55.26 | WP_041465160.1 |
| CDK039_03021 | hypothetical protein [Clavibacter sepedonicus] | 67.74 | WP_041465159.1 |
| CDK039_03020 | hypothetical protein [Clavibacter] | 59.15 | WP_012300415.1 |
| CDK039_03019 | hypothetical protein [Clavibacter] | 87.21 | WP_012300414.1 |
| CDK039_03018 | hypothetical protein [Clavibacter] | 84.57 | WP_012300413.1 |
| CDK039_03017 | hypothetical protein B5P19_15620 [Clavibacter sepedonicus] | 84.64 | OQJ45287.1 |
| CDK039_03016 | HD domain-containing protein [Clavibacter] | 83.55 | WP_041465156.1 |
| CDK039_03015 | hypothetical protein [Clavibacter] | 75 | WP_012300410.1 |
| CDK039_03014 | hypothetical protein [Clavibacter] | 92.39 | WP_012300409.1 |
| CDK039_03013 | hypothetical protein [Clavibacter] | 94.96 | WP_012300408.1 |
| CDK039_03012 | ParA family protein [Clavibacter] | 91.74 | WP_012300407.1 |
| CDK039_03011 | hypothetical protein [Clavibacter] | 75.95 | WP_012300406.1 |
| CDK039_03010 | hypothetical protein B5P19_15585 [Clavibacter sepedonicus] | 81.44 | OQJ45281.1 |
| CDK039_03009 | hypothetical protein [Clavibacter sp.] | 90.79 | WP_012300404.1 |
| CDK039_03008 | cell division protein FtsK [Clavibacter sepedonicus] | 87.5 | OQJ45280.1 |
| CDK039_03007 | hypothetical protein [Clavibacter sp.] | 60.24 | WP_041465154.1 |
| CDK039_03006 | hypothetical protein B5P19_15565 [Clavibacter sepedonicus] | 69.06 | OQJ45278.1 |
| CDK039_03005 | hypothetical protein B5P19_15560 [Clavibacter sepedonicus] | 80.43 | OQJ45277.1 |
| CDK039_03004 | hypothetical protein [Clavibacter sepedonicus] | 73.87 | WP_012300399.1 |
| CDK039_03003 | ATP-binding protein [Curtobacterium sp. C1] | 64.29 | WP_231051047.1 |
| CDK039_03002 | hypothetical protein B5P19_15540 [Clavibacter sepedonicus] | 58.56 | OQJ45274.1 |
| CDK039_03001 | hypothetical protein [Curtobacterium] | 45.35 | WP_128781735.1 |
| CDK039_03000 | conjugal transfer protein [Clavibacter] | 72.38 | WP_012300394.1 |
| CDK039_02999 | hypothetical protein [Clavibacter] | 98.75 | WP_012300393.1 |
| CDK039_02998 | hypothetical protein [Clavibacter] | 88.02 | WP_012300392.1 |
| CDK039_02997 | hypothetical protein [unclassified Arthrobacter] | 32.86 | WP_209750530.1 |
| CDK039_02996 | SAF domain-containing protein [Clavibacter] | 87.88 | WP_012300389.1 |
| CDK039_02995 | hypothetical protein [Clavibacter] | 89.57 | WP_012300388.1 |
| CDK039_02994 | ATPase, T2SS/T4P/T4SS family [Clavibacter] | 88.56 | WP_012300387.1 |
| CDK039_02993 | type II secretion system F family protein [Clavibacter sp.] | 80.8 | MBD5382491.1 |
| CDK039_02992 | hypothetical protein [Clavibacter] | 90.61 | WP_012300385.1 |
| CDK039_02991 | hypothetical protein [Clavibacter] | 76.06 | WP_012300384.1 |
| CDK039_02990 | hypothetical protein [Clavibacter] | 86.13 | WP_012300383.1 |
| CDK039_02989 | hypothetical protein [Clavibacter sepedonicus] | 90.77 | WP_012300382.1 |
| CDK039_02988 | hypothetical protein [Clavibacter] | 92 | WP_012300381.1 |
| CDK039_02987 | hypothetical protein [Clavibacter] | 77.31 | WP_012300380.1 |
| CDK039_02986 | hypothetical protein [Rathayibacter sp. SW19] | 67.44 | WP_308465216.1 |
| CDK039_02985 | LysM peptidoglycan-binding domain-containing protein [Clavibacter] | 87.84 | WP_012300378.1 |
| CDK039_02984 | A24 family peptidase [Clavibacter] | 74.04 | WP_012300377.1 |
| CDK039_02983 | hypothetical protein [Clavibacter] | 50 | WP_012300376.1 |
| CDK039_02982 | AAA family ATPase [Gordonia sputi] | 49.68 | WP_005208787.1 |
| CDK039_02981 | DUF6414 family protein [Actinocrinis puniceicyclus] | 52.05 | WP_211472381.1 |
| CDK039_02980 | hypothetical protein [Clavibacter] | 82.31 | WP_012300373.1 |
| CDK039_02979 | hypothetical protein [Clavibacter] | 86.89 | WP_012300369.1 |
| CDK039_02978 | hypothetical protein [Clavibacter] | 76.27 | WP_133064125.1 |
| CDK039_02977 | hypothetical protein [Clavibacter] | 93.33 | WP_133064124.1 |
| CDK039_02976 | hypothetical protein [Clavibacter michiganensis] | 85.45 | WP_316309495.1 |
| CDK039_02975 | hypothetical protein [Clavibacter] | 87.94 | WP_012300359.1 |
| CDK039_02974 | hypothetical protein [Clavibacter] | 89.59 | WP_012300358.1 |
| CDK039_02973 | hypothetical protein [Curtobacterium sp. ODYSSEY 48 V2] | 41.65 | WP_251155324.1 |
| CDK039_02972 | hypothetical protein [Clavibacter michiganensis] | 62.79 | WP_209657063.1 |
| CDK039_02971 | hypothetical protein [Clavibacter sepedonicus] | 84.55 | WP_106408786.1 |
| CDK039_02970 | hypothetical protein [Clavibacter] | 77.97 | WP_012300355.1 |
| CDK039_02969 | helix-turn-helix domain-containing protein [Nocardia sp. SSK8] | 61.29 | WP_336086397.1 |
| CDK039_02968 | type II toxin-antitoxin system HipA family toxin [Gordonia amarae] | 61.45 | WP_005191575.1 |
| CDK039_02967 | hypothetical protein [Clavibacter michiganensis] | 66.06 | WP_303062152.1 |
| CDK039_02966 | hypothetical protein [Clavibacter sp. VKM Ac-2872] | 71.61 | WP_194667521.1 |
| CDK039_02965 | ABC transporter ATP-binding protein [Clavibacter sp. VKM Ac-2872] | 81.6 | WP_194667520.1 |
| CDK039_02964 | hypothetical protein [Clavibacter sp. VKM Ac-2872] | 59.26 | WP_194667519.1 |
| CDK039_02963 | hypothetical protein [Clavibacter] | 83.1 | WP_012300354.1 |
| CDK039_02962 | hypothetical protein [Clavibacter] | 82 | WP_012300353.1 |
| CDK039_02961 | HNH endonuclease family protein [Clavibacter michiganensis] | 88.54 | WP_316309467.1 |
| CDK039_02960 | hypothetical protein [Clavibacter michiganensis] | 95.5 | WP_094131538.1 |
| CDK039_02959 | MFS transporter [Clavibacter nebraskensis] | 87.93 | WP_248888123.1 |
| CDK039_02958 | Lsr2 family protein [Clavibacter michiganensis] | 97.39 | WP_316291353.1 |
| CDK039_02957 | helix-turn-helix domain-containing protein [Clavibacter michiganensis] | 64.71 | WP_316289051.1 |
| CDK039_02956 | DNA-processing protein DprA [Clavibacter] | 81.21 | WP_049792022.1 |
| CDK039_02955 | hypothetical protein [Clavibacter sp. VKM Ac-2872] | 80.99 | WP_194667706.1 |
| CDK039_02954 | hypothetical protein [Curtobacterium poinsettiae] | 34.55 | WP_274007036.1 |
| CDK039_02953 | hypothetical protein [Clavibacter] | 74.42 | WP_043588233.1 |
| CDK039_02952 | hypothetical protein [Clavibacter sp. VKM Ac-2542] | 81.82 | WP_194683958.1 |
| CDK039_02951 | N/A |  |  |
| CDK039_02950 | antitoxin VbhA family protein [Clavibacter] | 89.29 | WP_012300321.1 |
| CDK039_02949 | N/A |  |  |
| CDK039_02948 | hypothetical protein [Clavibacter] | 72.25 | WP_041465163.1 |
| CDK039_02947 | hypothetical protein [Clavibacter phaseoli] | 57.5 | WP_194676292.1 |
| CDK039_02946 | hypothetical protein [Clavibacter phaseoli] | 82.09 | WP_194676301.1 |
| CDK044_02976 | hypothetical protein [Clavibacter michiganensis] | 100 | WP_045530837.1 |
| CDK044_02975 | replication protein [Clavibacter michiganensis] | 92.28 | WP_237583587.1 |
| CDK044_02974 | hypothetical protein [Clavibacter michiganensis] | 100 | WP_094131560.1 |
| CDK044_02973 | hypothetical protein [Clavibacter michiganensis] | 100 | WP_094131560.1 |
| CDK044_02972 | type II toxin-antitoxin system HicA family toxin [Clavibacter michiganensis] | 100 | WP_094131562.1 |
| CDK044_02971 | antitoxin HicB [Clavibacter michiganensis] | 100 | WP_094131563.1 |
| CDK044_02970 | ParA family protein [Clavibacter] | 100 | WP_011931127.1 |
| CDK044_02969 | partitioning protein [Clavibacter michiganensis subsp. tessellarius] | 100 | OQJ61435.1 |
| CDK044_02968 | helix-turn-helix transcriptional regulator [Clavibacter michiganensis subsp. tessellarius] | 100 | UKF35512.1 |
| CDK044_02967 | conjugal transfer protein [Clavibacter michiganensis] | 100 | WP_094131566.1 |
| CDK044_02966 | TcpD family membrane protein [Clavibacter michiganensis] | 100 | WP_094131567.1 |
| CDK044_02965 | hypothetical protein [Clavibacter michiganensis] | 100 | WP_378143181.1 |
| CDK044_02964 | ATP-binding protein [Clavibacter michiganensis] | 92.18 | WP_094131569.1 |
| CDK044_02963 | hypothetical protein [Clavibacter michiganensis] | 99.25 | WP_104294693.1 |
| CDK044_02962 | hypothetical protein [Clavibacter michiganensis] | 98 | WP_104294694.1 |
| CDK044_02961 | hypothetical protein [Clavibacter michiganensis] | 98.22 | WP_094131572.1 |
| CDK044_02960 | hypothetical protein [Clavibacter michiganensis] | 100 | WP_094131573.1 |
| CDK044_02959 | cobalamin biosynthesis protein CobQ [Clavibacter michiganensis] | 98.24 | WP_104294696.1 |
| CDK044_02958 | hypothetical protein [Clavibacter michiganensis] | 97.06 | WP_214584366.1 |
| CDK044_02957 | hypothetical protein [Clavibacter michiganensis] | 98.25 | WP_104294698.1 |
| CDK044_02956 | single-stranded DNA-binding protein [Clavibacter michiganensis] | 99.24 | WP_214584364.1 |
| CDK044_02955 | HNH endonuclease family protein [Clavibacter michiganensis] | 92.64 | WP_316288728.1 |
| CDK044_02954 | hypothetical protein [Clavibacter michiganensis] | 98.26 | WP_052663299.1 |
| CDK044_02953 | NYN domain-containing protein [Clavibacter] | 78.46 | WP_012300336.1 |
| CDK044_02952 | hypothetical protein [Clavibacter phaseoli] | 74.58 | WP_194676233.1 |
| CDK044_02951 | DUF3892 domain-containing protein [Clavibacter michiganensis] | 83.91 | WP_011931277.1 |
| CDK044_02950 | recombinase family protein [Clavibacter nebraskensis] | 91.5 | WP_157448017.1 |
| CDK044_02949 | hypothetical protein [Clavibacter michiganensis] | 98.24 | WP_108742844.1 |
| CDK044_02948 | hypothetical protein [Clavibacter michiganensis] | 75.86 | WP_148267479.1 |
| CDK045_02986 | ImmA/IrrE family metallo-endopeptidase [Rathayibacter sp. AY1C9] | 90.27 | WP_104269591.1 |
| CDK045_02985 | multiubiquitin domain-containing protein [Rathayibacter sp. AY1C9] | 86.39 | WP_104269589.1 |
| CDK045_02984 | hypothetical protein [Rathayibacter rubneri] | 88.1 | WP_251947065.1 |
| CDK045_02983 | hypothetical protein C5D09_14080 [Rathayibacter sp. AY1C9] | 89.84 | PPH44150.1 |
| CDK045_02982 | DUF3800 domain-containing protein [Rathayibacter rubneri] | 92.73 | MCM6763748.1 |
| CDK045_02981 | DUF4913 domain-containing protein [Clavibacter michiganensis] | 84.94 | WP_303062828.1 |
| CDK045_02980 | type IV secretory system conjugative DNA transfer family protein [Clavibacter michiganensis] | 91.9 | WP_258071864.1 |
| CDK045_02979 | ATP/GTP-binding protein [Clavibacter michiganensis] | 97.39 | WP_374953167.1 |
| CDK045_02978 | SCO6880 family protein [Clavibacter michiganensis] | 98.61 | WP_303062159.1 |
| CDK045_02977 | hypothetical protein [Clavibacter sp. VKM Ac-2542] | 99.43 | WP_194685074.1 |
| CDK045_02976 | hypothetical protein [Clavibacter michiganensis] | 92.95 | WP_303062157.1 |
| CDK045_02975 | hypothetical protein [Clavibacter] | 100 | WP_119400957.1 |
| CDK045_02974 | hypothetical protein [Clavibacter michiganensis] | 97.49 | WP_216841539.1 |
| CDK045_02973 | hypothetical protein [Clavibacter michiganensis subsp. michiganensis] | 94.49 | MWJ49053.1 |
| CDK045_02972 | transcriptional regulator [Clavibacter phaseoli] | 98.31 | MBF4632690.1 |
| CDK045_02971 | alpha/beta fold hydrolase [Clavibacter phaseoli] | 94.54 | WP_194676260.1 |
| CDK045_02970 | hypothetical protein [Clavibacter phaseoli] | 97.85 | WP_194676261.1 |
| CDK045_02969 | hypothetical protein [Clavibacter phaseoli] | 96.43 | WP_194676262.1 |
| CDK045_02968 | hypothetical protein [Clavibacter phaseoli] | 97.93 | WP_194676263.1 |
| CDK045_02967 | hypothetical protein [Clavibacter phaseoli] | 98.75 | WP_194676264.1 |
| CDK045_02966 | helix-turn-helix domain-containing protein [Clavibacter michiganensis] | 92.65 | WP_273946723.1 |
| CDK045_02965 | hypothetical protein [Clavibacter sp. VKM Ac-2542] | 34.94 | WP_194685081.1 |
| CDK045_02964 | chromosome partitioning protein [Clavibacter michiganensis subsp. michiganensis] | 93.28 | MWJ84916.1 |
| CDK045_02963 | hypothetical protein [Clavibacter michiganensis] | 53.97 | WP_086521719.1 |
| CDK045_02962 | hypothetical protein [Clavibacter michiganensis] | 96.81 | WP_216841497.1 |
| CDK045_02961 | N/A |  |  |
| CDK045_02960 | hypothetical protein AES38_15295 [Clavibacter capsici] | 48.7 | ALD14434.1 |
| CDK045_02959 | ArdC-like ssDNA-binding domain-containing protein [Clavibacter phaseoli] | 96.35 | WP_194676267.1 |
| CDK045_02958 | hypothetical protein [Clavibacter michiganensis] | 92.61 | WP_160469535.1 |
| CDK045_02957 | AAA family ATPase [Clavibacter michiganensis] | 99.53 | WP_160469536.1 |
| CDK045_02956 | hypothetical protein [Clavibacter michiganensis] | 96.33 | WP_160469537.1 |
| CDK045_02955 | single-stranded DNA-binding protein [Clavibacter michiganensis] | 91.34 | WP_316318488.1 |
| CDK045_02954 | hypothetical protein [Clavibacter michiganensis] | 100 | WP_160483842.1 |
| CDK045_02953 | hypothetical protein [Clavibacter phaseoli] | 88.03 | WP_194676233.1 |
| CDK045_02952 | hypothetical protein [Microbacterium sp. YJN-G] | 56.23 | WP_193596584.1 |
| CDK045_02951 | acetate/propionate family kinase [Clavibacter] | 92.31 | WP_094114081.1 |
| CDK045_02950 | recombinase family protein [Clavibacter michiganensis] | 98.02 | WP_104290005.1 |
| CDK045_02949 | hypothetical protein [Paenarthrobacter sp. YIM B13468] | 46.09 | WP_377654300.1 |
| CDK045_02948 | hypothetical protein [Clavibacter michiganensis] | 45.24 | WP_160448262.1 |
| CDK045_02947 | hypothetical protein [Clavibacter sp. VKM Ac-2542] | 92.31 | WP_194685067.1 |
| CDK045_02946 | plasmid mobilization relaxosome protein MobC [Clavibacter sp. VKM Ac-2542] | 99.26 | WP_194685069.1 |
| CDK045_02945 | relaxase/mobilization nuclease domain-containing protein [Clavibacter michiganensis] | 98.54 | WP_303062831.1 |
| CDK045_02944 | hypothetical protein [Clavibacter sp. VKM Ac-2542] | 89.33 | WP_194685071.1 |
| CDK045_02943 | hypothetical protein [Microbacterium sp. B2969] | 74.92 | WP_397558614.1 |
| CDK046_02989 | N/A |  |  |
| CDK046_02988 | GNAT family N-acetyltransferase [Clavibacter nebraskensis] | 100 | WP_248888131.1 |
| CDK046_02987 | hypothetical protein [Clavibacter nebraskensis] | 100 | WP_248888132.1 |
| CDK046_02986 | Fic family protein [Clavibacter nebraskensis] | 100 | WP_248888133.1 |
| CDK046_02985 | hypothetical protein LIX22_002952 [Clavibacter nebraskensis] | 100 | UQB17881.1 |
| CDK046_02984 | hypothetical protein [Clavibacter nebraskensis] | 100 | WP_248888135.1 |
| CDK046_02983 | ParB/RepB/Spo0J family partition protein [Clavibacter nebraskensis] | 100 | WP_248888136.1 |
| CDK046_02982 | hypothetical protein LIX22_002955 [Clavibacter nebraskensis] | 100 | UQB17884.1 |
| CDK046_02981 | ArdC-like ssDNA-binding domain-containing protein [Clavibacter nebraskensis] | 99.33 | WP_248888138.1 |
| CDK046_02980 | hypothetical protein [Clavibacter] | 100 | WP_158385430.1 |
| CDK046_02979 | single-stranded DNA-binding protein [Clavibacter nebraskensis] | 100 | WP_248888139.1 |
| CDK046_02978 | hypothetical protein [Clavibacter nebraskensis] | 100 | WP_248888140.1 |
| CDK046_02977 | HNH endonuclease family protein [Clavibacter nebraskensis] | 100 | WP_248888141.1 |
| CDK046_02976 | hypothetical protein [Clavibacter nebraskensis] | 100 | WP_248888142.1 |
| CDK046_02975 | hypothetical protein [Clavibacter nebraskensis] | 98.77 | WP_248888143.1 |
| CDK046_02974 | hypothetical protein LIX22_002963 [Clavibacter nebraskensis] | 100 | UQB17891.1 |
| CDK046_02973 | relaxase domain-containing protein [Clavibacter nebraskensis] | 100 | UQB17892.1 |
| CDK046_02972 | relaxase domain-containing protein [Clavibacter nebraskensis] | 98.95 | UQB17893.1 |
| CDK046_02971 | DUF4913 domain-containing protein [Clavibacter michiganensis] | 95.14 | WP_227335224.1 |
| CDK046_02970 | type IV secretory system conjugative DNA transfer family protein [Clavibacter nebraskensis] | 99.45 | WP_248888099.1 |
| CDK046_02969 | hypothetical protein [Clavibacter michiganensis] | 100 | WP_094182742.1 |
| CDK046_02968 | hypothetical protein [Clavibacter nebraskensis] | 100 | WP_248888100.1 |
| CDK046_02967 | C40 family peptidase [Clavibacter nebraskensis] | 100 | WP_248888101.1 |
| CDK046_02966 | hypothetical protein [Clavibacter nebraskensis] | 100 | WP_248888102.1 |
| CDK046_02965 | AAA family ATPase [Clavibacter nebraskensis] | 100 | WP_248888103.1 |
| CDK046_02964 | ATP-binding protein [Clavibacter nebraskensis] | 100 | UQB17853.1 |
| CDK046_02963 | SCO6880 family protein [Clavibacter nebraskensis] | 100 | WP_248888105.1 |
| CDK046_02962 | hypothetical protein [Clavibacter nebraskensis] | 100 | WP_248888106.1 |
| CDK046_02961 | hypothetical protein [Clavibacter nebraskensis] | 100 | WP_248888107.1 |
| CDK046_02960 | hypothetical protein [Clavibacter nebraskensis] | 99.15 | WP_248888108.1 |
| CDK046_02959 | alpha/beta hydrolase [Clavibacter nebraskensis] | 99.74 | UQB17858.1 |
| CDK046_02958 | hypothetical protein [Clavibacter nebraskensis] | 100 | WP_248888111.1 |
| CDK046_02957 | hypothetical protein [Clavibacter nebraskensis] | 100 | WP_248888114.1 |
| CDK046_02956 | hypothetical protein LIX22_003002 [Clavibacter nebraskensis] | 98.47 | UQB17863.1 |
| CDK046_02955 | hypothetical protein [Clavibacter nebraskensis] | 100 | WP_248888117.1 |
| CDK046_02954 | ParA family protein [Clavibacter nebraskensis] | 100 | WP_248888118.1 |
| CDK046_02953 | hypothetical protein [Clavibacter nebraskensis] | 100 | WP_248888119.1 |
| CDK046_02952 | hypothetical protein [Clavibacter nebraskensis] | 100 | WP_248888120.1 |
| CDK046_02951 | hypothetical protein [Clavibacter nebraskensis] | 100 | WP_248888121.1 |
| CDK046_02950 | hypothetical protein [Clavibacter nebraskensis] | 100 | WP_248888122.1 |
| CDK046_02949 | hypothetical protein [Clavibacter michiganensis] | 70.51 | WP_367153308.1 |
| CDK046_02948 | MFS transporter [Clavibacter nebraskensis] | 99.51 | WP_248888123.1 |
| CDK046_02947 | Lsr2 family protein [Clavibacter nebraskensis] | 100 | WP_248888124.1 |
| CDK046_02946 | Lsr2 family protein [Clavibacter nebraskensis] | 100 | WP_248888124.1 |
| CDK046_02945 | SOS response-associated peptidase [Clavibacter nebraskensis] | 100 | WP_283107739.1 |
| CDK046_02944 | hypothetical protein [Clavibacter michiganensis] | 85.19 | WP_316289053.1 |
| CDK046_02943 | AAA family ATPase [Clavibacter nebraskensis] | 100 | WP_248888128.1 |
| CDK046_02942 | hypothetical protein [Clavibacter nebraskensis] | 100 | WP_248888129.1 |

**Supplementary Table 5.** (CSV file)Whole-genome allelic variation in avirulent strains.

**
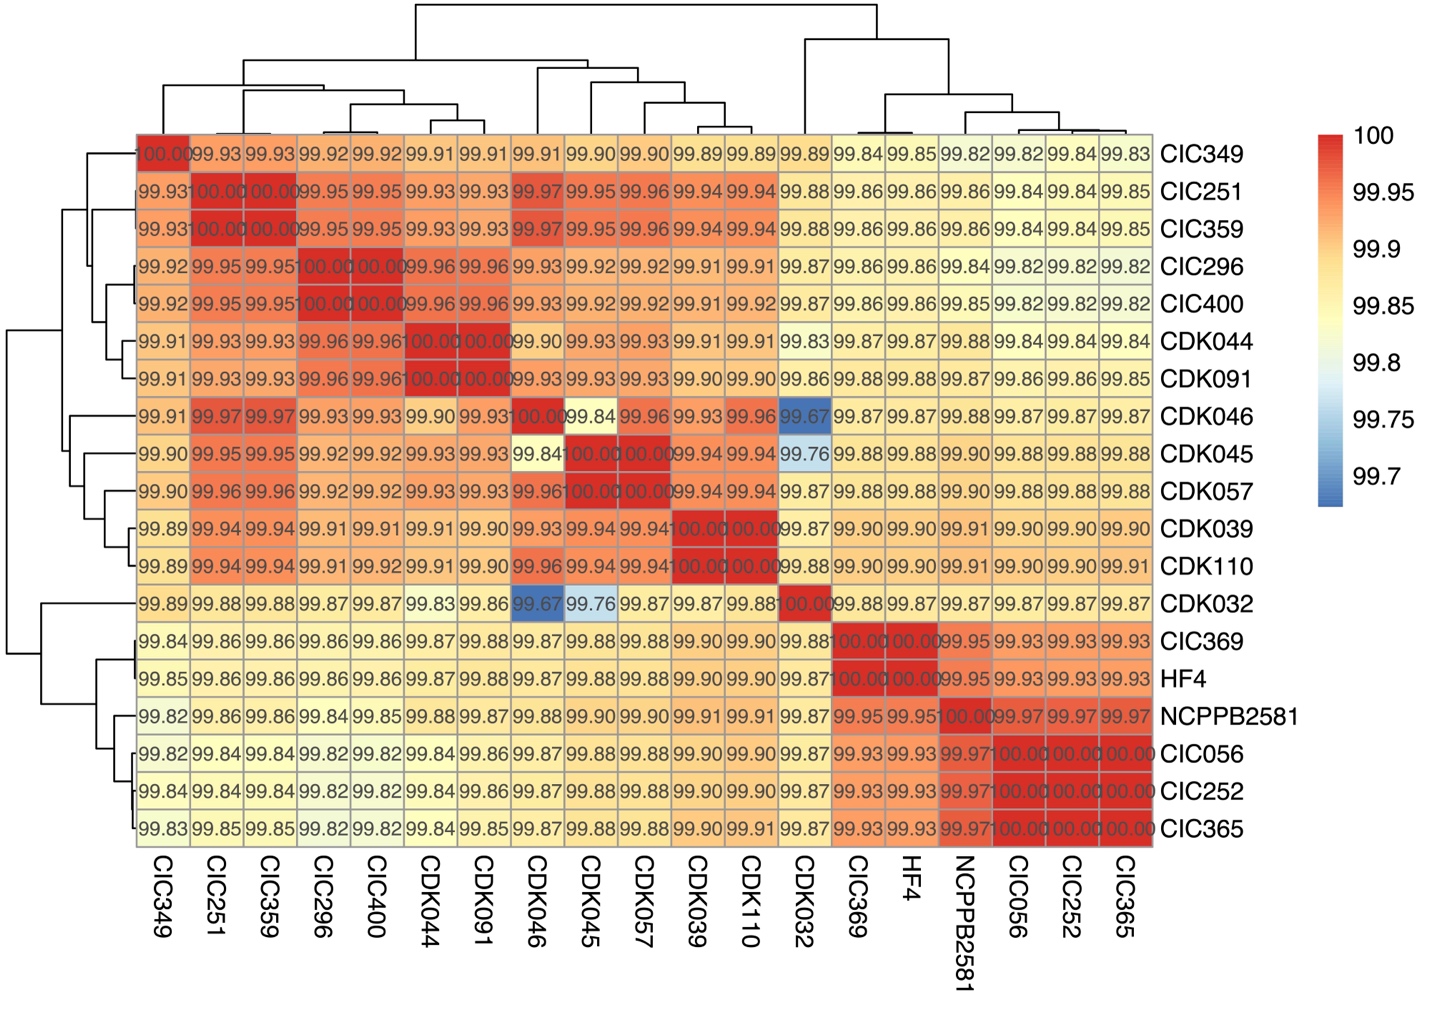
**

**Supplementary Figure 1.** Average nucleotide identity (ANI) between strains, calculated using a pairwise approach with FastANIv1.1.
