# Supplementary material for: Comparative genomics of the Gram-positive bacterial pathogen of maize, Clavibacter nebraskensis, reveals genomic variation between strains of varying aggressiveness
Source: Research Square preprint supplement (doi:10.21203/rs.3.rs-7860969/v1), 2025-10-21
Supplement: Supplementary file 2 [file ae3e6f47bea2dc99e340c606.xlsx]

## Sheet: Sheet1
Strain	Polymorphism Length	Polymorphism Type	CDS	Locus	Product	Protein Effect	Protein ID
CIC365	1	SNP (transversion)	rsmG CDS	CMN_RS14510	16S rRNA (guanine(-N()-methyltransferase RsmG	None	WP_015491528.1
CIC365	1	SNP (transversion)	hypothetical protein CDS	CMN_RS14205	hypothetical protein	Substitution	WP_015491472.1
CIC365	1	SNP (transition)	MinD/ParA family ATP-binding protein CDS	CMN_RS13895	MinD/ParA family ATP-binding protein	Substitution	WP_015491413.1
CIC365	1	SNP (transition)	mmuM CDS	CMN_RS13785	homocysteine S-methyltransferase	Substitution	WP_015491390.1
CIC365	324	Deletion	YqaJ viral recombinase family protein CDS	CMN_RS13525	YqaJ viral recombinase family protein	Start Codon Loss	WP_041465584.1
CIC365	108	Deletion
CIC365	1	Deletion
CIC365	8	Deletion
CIC365	1	SNP (transition)	ABC transporter permease CDS	CMN_RS13320	ABC transporter permease	Start Codon Loss	WP_015491302.1
CIC365	9	Deletion	cellulase family glycosylhydrolase CDS	CMN_RS11795	cellulase family glycosylhydrolase	Frame Shift	WP_015491041.1
CIC365	6	Deletion (tandem repeat)	cellulase family glycosylhydrolase CDS	CMN_RS11795	cellulase family glycosylhydrolase	Deletion	WP_015491041.1
CIC365	6	Deletion (tandem repeat)	cellulase family glycosylhydrolase CDS	CMN_RS11795	cellulase family glycosylhydrolase	Deletion	WP_015491041.1
CIC365	36	Deletion	cellulase family glycosylhydrolase CDS	CMN_RS11795	cellulase family glycosylhydrolase	Deletion	WP_015491041.1
CIC365	1	Deletion	cellulase family glycosylhydrolase CDS	CMN_RS11795	cellulase family glycosylhydrolase	Frame Shift	WP_015491041.1
CIC365	0	Insertion (tandem repeat)	alpha-N-arabinofuranosidase CDS	CMN_RS11755	alpha-N-arabinofuranosidase	Frame Shift	WP_015491033.1
CIC365	1	SNP (transition)	NAD(P)/FAD-dependent oxidoreductase CDS	CMN_RS11035	NAD(P)/FAD-dependent oxidoreductase	Substitution	WP_015490896.1
CIC365	1	SNP (transversion)	ABC transporter substrate-binding protein CDS	CMN_RS07150	ABC transporter substrate-binding protein	None	WP_015490165.1
CIC365	1	Deletion	glgP CDS	CMN_RS06720	alpha-glucan family phosphorylase	Frame Shift	WP_015490085.1
CIC365	1	SNP (transition)
CIC365	0	Insertion
CIC365	1	Deletion	histidine-type phosphatase CDS	CMN_RS02015	histidine-type phosphatase	Frame Shift	WP_015489195.1
CIC365, CIC369, HF4	0	Insertion (tandem repeat)
HF4	1	SNP (transversion)	hypothetical protein CDS	CMN_RS14205	hypothetical protein	Substitution	WP_015491472.1
HF4	9	Deletion	hypothetical protein CDS	CMN_RS13960	hypothetical protein	Deletion	WP_015491425.1
HF4	1	SNP (transition)	GAF and ANTAR domain-containing protein CDS	CMN_RS13355	GAF and ANTAR domain-containing protein	Substitution	WP_015491308.1
HF4	1	SNP (transversion)	response regulator transcription factor CDS	CMN_RS12985	response regulator transcription factor	Substitution	WP_404842828.1
HF4	1	SNP (transition)	rpoB CDS	CMN_RS12805	DNA-directed RNA polymerase subunit beta	Substitution	WP_015491202.1
HF4	1	SNP (transversion)	23S rRNA
HF4	2	Substitution	23S rRNA
HF4	1	SNP (transversion)	23S rRNA
HF4	1	SNP (transversion)	23S rRNA
HF4	1	SNP (transversion)	23S rRNA
HF4	1	SNP (transition)	23S rRNA
HF4	1	SNP (transition)
HF4	1	SNP (transversion)
HF4	1	SNP (transversion)	rsmH CDS	CMN_RS09140	16S rRNA (cytosine(-N()-methyltransferaseRsmH	None	WP_015490531.1
HF4	1	SNP (transition)	Mur ligase family protein CDS	CMN_RS09125	Mur ligase family protein	Substitution	WP_015490528.1
HF4	1	SNP (transversion)	FtsQ-type POTRA domain-containing protein CDS	CMN_RS09090	FtsQ-type POTRA domain-containing protein	None	WP_227077668.1
HF4	1	SNP (transition)	DUF885 domain-containing protein CDS	CMN_RS08550	DUF885 domain-containing protein	Substitution	WP_015490422.1
HF4	1	SNP (transition)	lactonase family protein CDS	CMN_RS07730	lactonase family protein	None	WP_015490273.1
HF4	2	Substitution	dusB CDS	CMN_RS07685	tRNA dihydrouridine synthase DusB	Substitution	WP_015490264.1
HF4	1	SNP (transition)	DNA polymerase III subunit alpha CDS	CMN_RS07355	DNA polymerase III subunit alpha	None	WP_015490201.1
HF4	1	SNP (transition)	phosphatidate cytidylyltransferase CDS	CMN_RS06660	phosphatidate cytidylyltransferase	None	WP_015490073.1
HF4	0	Insertion (tandem repeat)	response regulator CDS	CMN_RS05925	response regulator	Frame Shift	WP_015489938.1
HF4	1	SNP (transition)	ATP-dependent helicase CDS	CMN_RS05700	ATP-dependent helicase	Substitution	WP_015489894.1
HF4	1	SNP (transition)
HF4	1	SNP (transversion)
HF4	75	Deletion	DEAD/DEAH box helicase CDS	CMN_RS03510	DEAD/DEAH box helicase	Deletion	WP_015489476.1
HF4	0	Insertion (tandem repeat)	septum formation family protein CDS	CMN_RS02120	septum formation family protein	Insertion	WP_015489216.1
HF4	1	SNP (transition)	NAD-dependent epimerase/dehydratase family protein CDS	CMN_RS02030	NAD-dependent epimerase/dehydratase family protein	None	WP_015489198.1
